# Supplementary material for: Association of COVID-19 mortality with serum selenium, zinc and copper: Six observational studies across Europe
Source: PubMed Central journal article supplement (PMC9742896; doi:10.3389/fimmu.2022.1022673), 2022-11-28
Supplement: DataSheet_1.pdf [file DataSheet_1.pdf]

## *Supplementary Material*

**Supplementary Table 1. Relevant background information by cohort**

| TASC-3B        |                     |                                                                                                                                                                                                                                                                                                                                                                                                                  |
|----------------|---------------------|------------------------------------------------------------------------------------------------------------------------------------------------------------------------------------------------------------------------------------------------------------------------------------------------------------------------------------------------------------------------------------------------------------------|
| <b>Cohort</b>  | Full Name           | Traceelement ATORG Study COVID-19 in Berlin, Bavaria and Baden-Württemberg                                                                                                                                                                                                                                                                                                                                       |
| <b>Germany</b> | Description         | Characterization of COVID-19 infections using immune system parameters and trace element status.                                                                                                                                                                                                                                                                                                                 |
|                | References/ID       | ID: DRKS00022294                                                                                                                                                                                                                                                                                                                                                                                                 |
|                | Contact             | Prof. Lutz Schomburg                                                                                                                                                                                                                                                                                                                                                                                             |
|                | Funding Information | Budgetary funds of Klinikum Aschaffenburg-Alzenaugemeinnützige GmbH, no external funding                                                                                                                                                                                                                                                                                                                         |
| Co-Vim         |                     |                                                                                                                                                                                                                                                                                                                                                                                                                  |
| <b>Cohort</b>  | Full Name           | Cohort 1: UZ Gent (Co-Vim) Virological and Immunological Monitoring in Patients (suspected of/confirmed with) COVID-19 – Cohort 2: AZ Jan Palfijn: Course and survival of COVID-19 patients with comorbidities in relation to the trace element status at hospital admission                                                                                                                                     |
| <b>Belgium</b> | Description         | Cross-sectional observational study conducted at two hospitals in Ghent, Belgium, to investigate whether Se and/or Zn deficiency upon hospital admission correlates to disease severity and mortality risk in COVID-19 patients with or without co-morbidities. Trace element concentrations along with additional biomarkers were determined in serum or plasma and associated to disease severity and outcome. |
|                | References/ID       | BC-07492                                                                                                                                                                                                                                                                                                                                                                                                         |
|                | Contact             | Prof. Gijs Du Laing, Mirko Petrovic                                                                                                                                                                                                                                                                                                                                                                              |
|                | Funding Information | Budgetary funds of Ghent University, UZ Ghent and AZ Jan Palfijn, no external funding                                                                                                                                                                                                                                                                                                                            |
| COVID-HUS      |                     |                                                                                                                                                                                                                                                                                                                                                                                                                  |
| <b>Cohort</b>  | Full Name           | COVID- Hôpitaux Universitaires de Strasbourg (HUS)                                                                                                                                                                                                                                                                                                                                                               |
| <b>France</b>  | Description         | The COVID-HUS study is a monocentric observational longitudinal cohort study enrolling COVID-19 patients admitted at the Strasbourg University Hospitals.                                                                                                                                                                                                                                                        |
|                | References/ID       | NCT 04405726                                                                                                                                                                                                                                                                                                                                                                                                     |
|                | Contact             | Prof. Alain Lescure, Samira Fafi-Kremer                                                                                                                                                                                                                                                                                                                                                                          |
|                | Funding Information | This study was supported by the Strasbourg University Hospital (COVID-HUS study-HUS N 7760)                                                                                                                                                                                                                                                                                                                      |
| COV-endo study |                     |                                                                                                                                                                                                                                                                                                                                                                                                                  |
| <b>Cohort</b>  | Full Name           | COVENDO                                                                                                                                                                                                                                                                                                                                                                                                          |
| <b>Italy</b>   | Description         | Characterization of the endocrine dysfunctions associated with covid-19 infection in hospitalized patients                                                                                                                                                                                                                                                                                                       |
|                | References/ID       | n 05C021_2020                                                                                                                                                                                                                                                                                                                                                                                                    |
|                | Contact             | Prof. Luca Persani                                                                                                                                                                                                                                                                                                                                                                                               |
|                | Funding Information | The work was partially supported by the Ricerca Corrente Funds of Istituto Auxologico Italiano (Acronym: COV-endo study, n 05C021_2020)                                                                                                                                                                                                                                                                          |
| ENDO-COVID-PL  |                     |                                                                                                                                                                                                                                                                                                                                                                                                                  |
| <b>Cohort</b>  | Full Name           | COVID-19: Analysis of Vitamin D, ghrelin and other neuropeptides over the course of SARS-CoV-2 infection.                                                                                                                                                                                                                                                                                                        |
| <b>Poland</b>  | Description         | Analysis of trace elements, Vitamin D, ghrelin, TSH, thyroid hormones, hepcidin and irisin with population hospitalized due to COVID-19 in regional hospital in Stupca, Poland.                                                                                                                                                                                                                                  |
|                | References/ID       | Regional bioethical committee agreement – 19.01.2022                                                                                                                                                                                                                                                                                                                                                             |

## Supplementary Material

|  |                     |                                                                                                     |
|--|---------------------|-----------------------------------------------------------------------------------------------------|
|  | Contact             | Pawel Komarnicki, Marek Ruchala, Zbigniew Krasinski                                                 |
|  | Funding Information | Department of Endocrinology, Metabolism and Internal Disease, Poznań University of Medical Sciences |

|                |                     |                                                                                                                                                                                                        |
|----------------|---------------------|--------------------------------------------------------------------------------------------------------------------------------------------------------------------------------------------------------|
|                |                     | <b>AID</b>                                                                                                                                                                                             |
| <b>Cohort</b>  | Full Name           | All Ireland Infectious Diseases Study                                                                                                                                                                  |
| <b>Ireland</b> | Description         | The All Ireland Infectious Diseases Study is a prospective multicentric study, enrolling COVID-19 patients.                                                                                            |
|                | References/ID       | The AIID Cohort is approved by local institutional review boards and all participants provide written, informed consent.                                                                               |
|                | Contact             | David J. Hughes, Patrick Mallon                                                                                                                                                                        |
|                | Funding Information | Science Foundation Ireland under the Science Foundation Ireland, Enterprise Ireland, IDA Ireland COVID-19 Rapid Response Funding Call (Grant number: COVID-RRC 20/COV/0103 and COVID-RRC 20/COV/0305). |

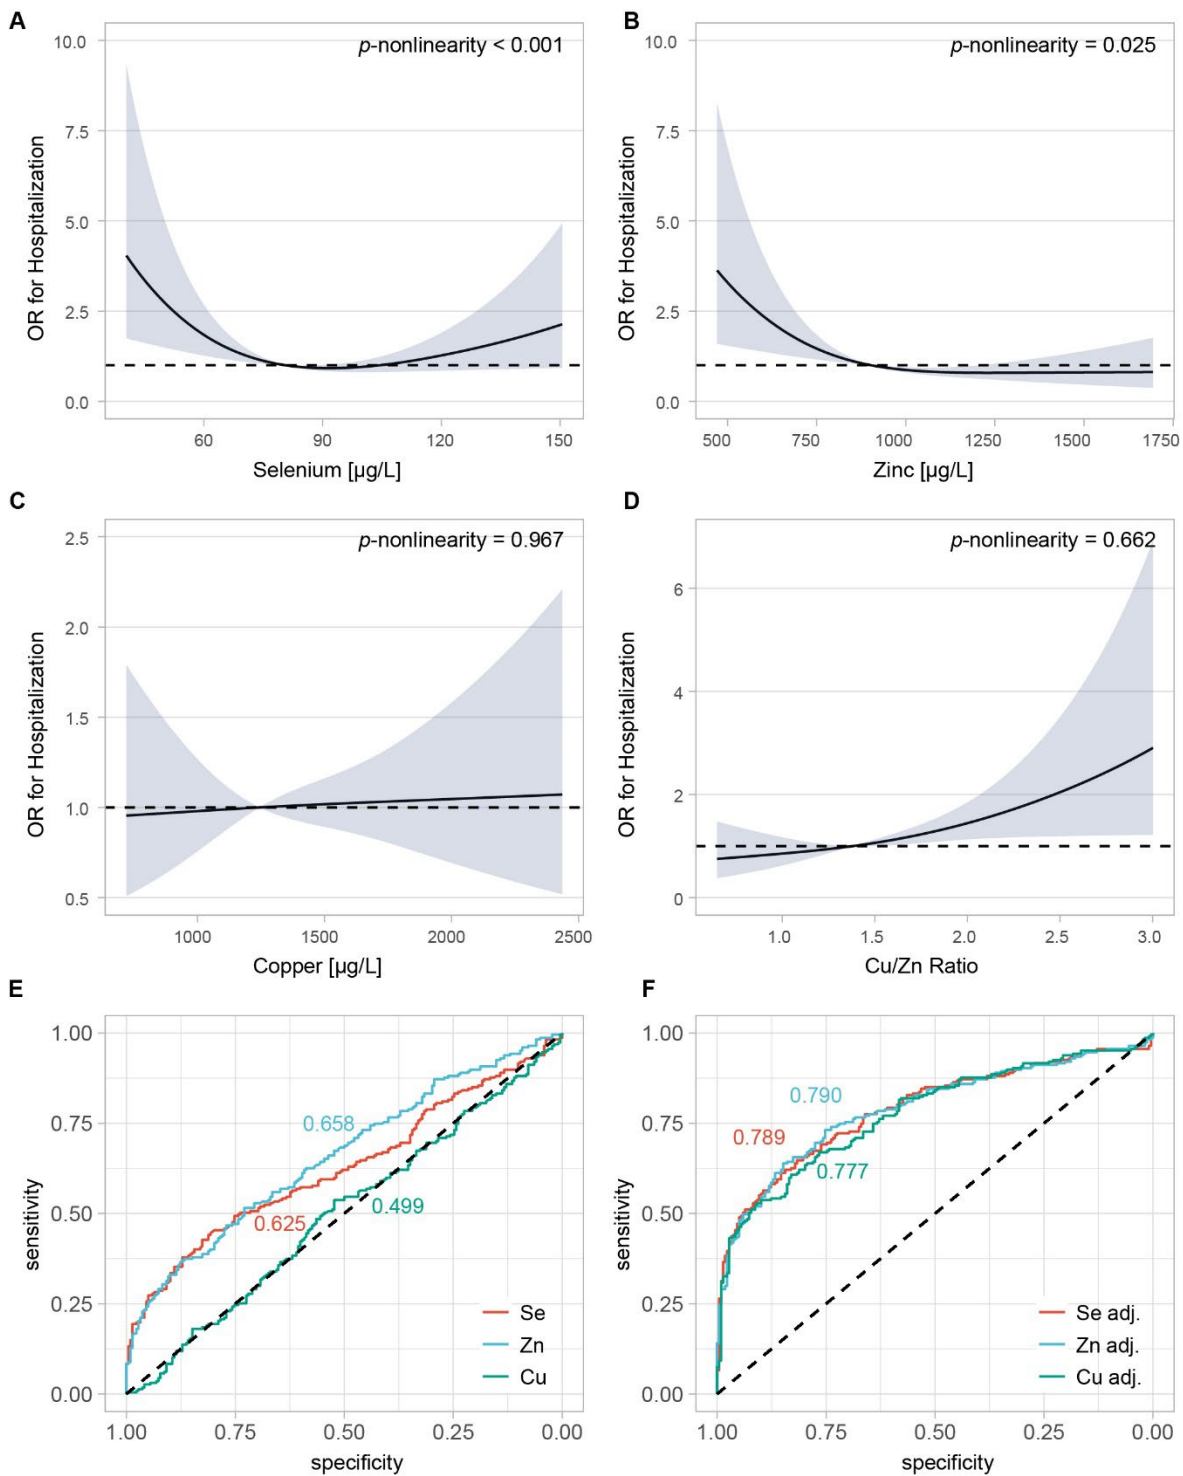

**Supplementary Figure 1. Adjusted restricted cubic spline regression for the odds ratio of hospitalization in the Ireland study.** A,B,C,D Restricted cubic spline regression with 3 knots at 10<sup>th</sup>, 50<sup>th</sup> and 90<sup>th</sup> centiles were conducted to assess the relationship between trace elements and odds ratio (OR) of hospitalization. All analyses were adjusted for age and sex of the patients.  $P$  for nonlinearity was calculated by comparing nested linear regression models to the restricted cubic splines by likelihood ratio  $X^2$  test. E Se, Zn and Cu were evaluated as individual predictors in relation to hospitalization using the restricted cubic spline model. Areas under the curves (AUC) are plotted for each predictor. F Models were further adjusted for age and sex.
